# Supplementary material for: Co-Occurrence of Regulated and Emerging Mycotoxins in Corn Silage: Relationships with Fermentation Quality and Bacterial Communities
Source: MDPI journal article supplement (doi:10.3390/toxins13030232), 2021-03-23
Supplement: s1 [file s1]

# Supplementary Materials: Co-Occurrence of Regulated and Emerging Mycotoxins in Corn Silage: Relationships with Fermentation Quality and Bacterial Communities

Antonio Gallo, Francesca Ghilardelli, Alberto Stanislao Atzori, Severino Zara, Barbara Novak, Johannes Faas and Francesco Fancello

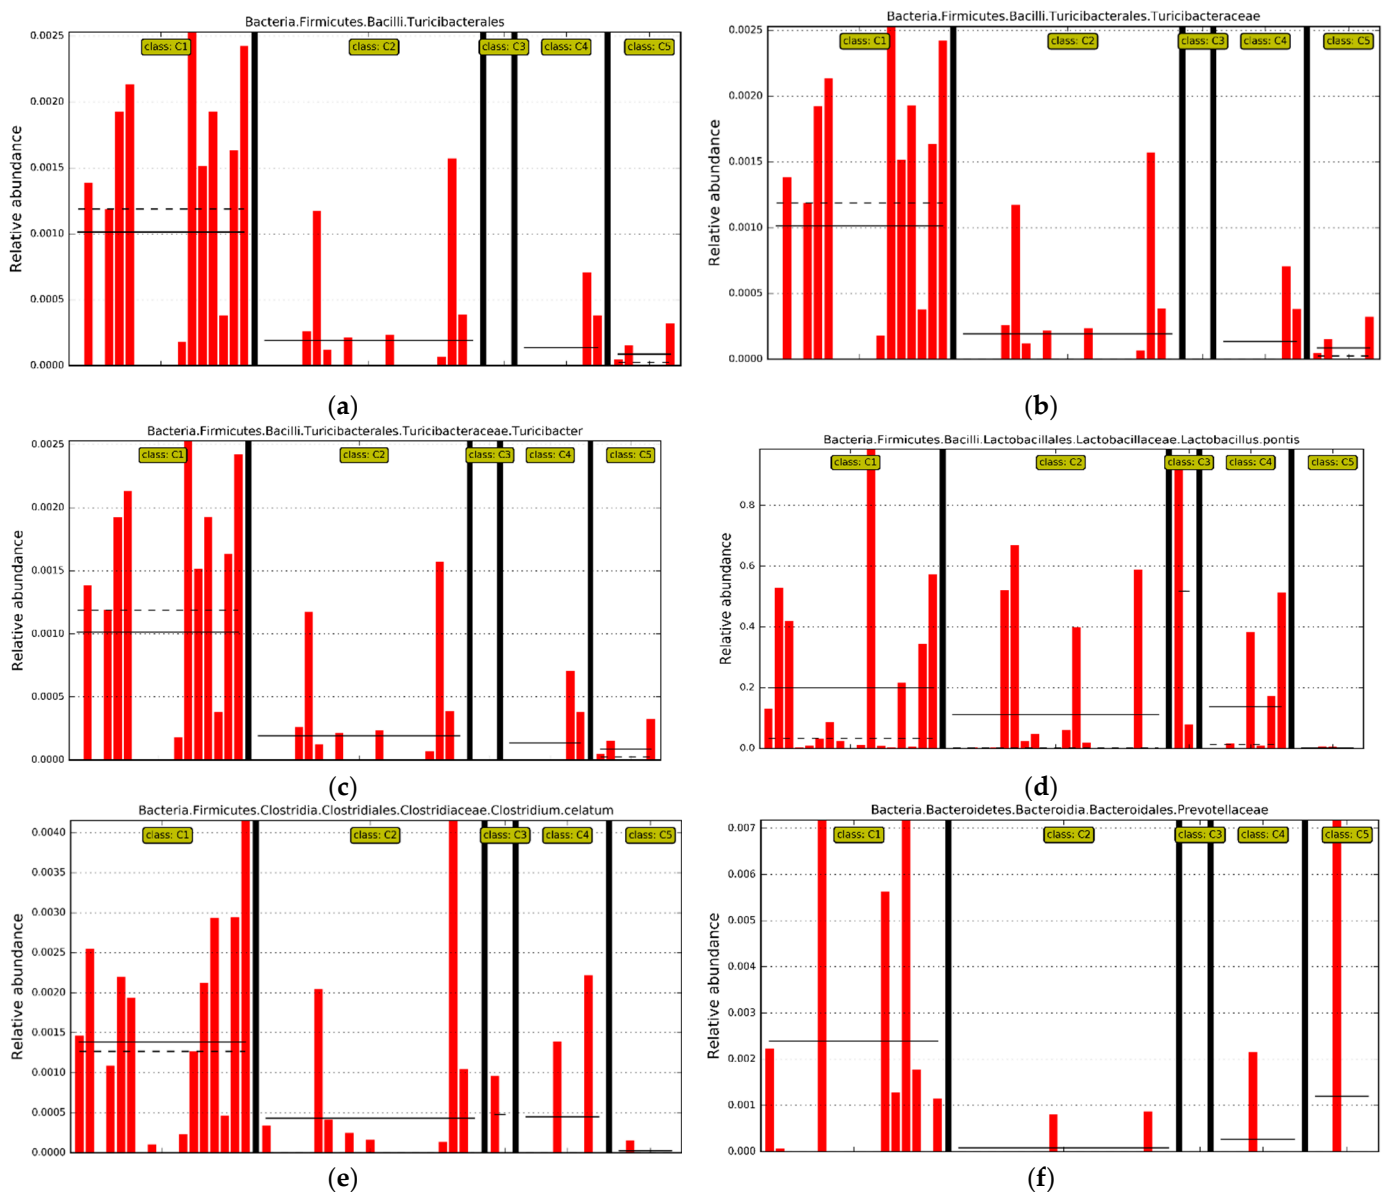

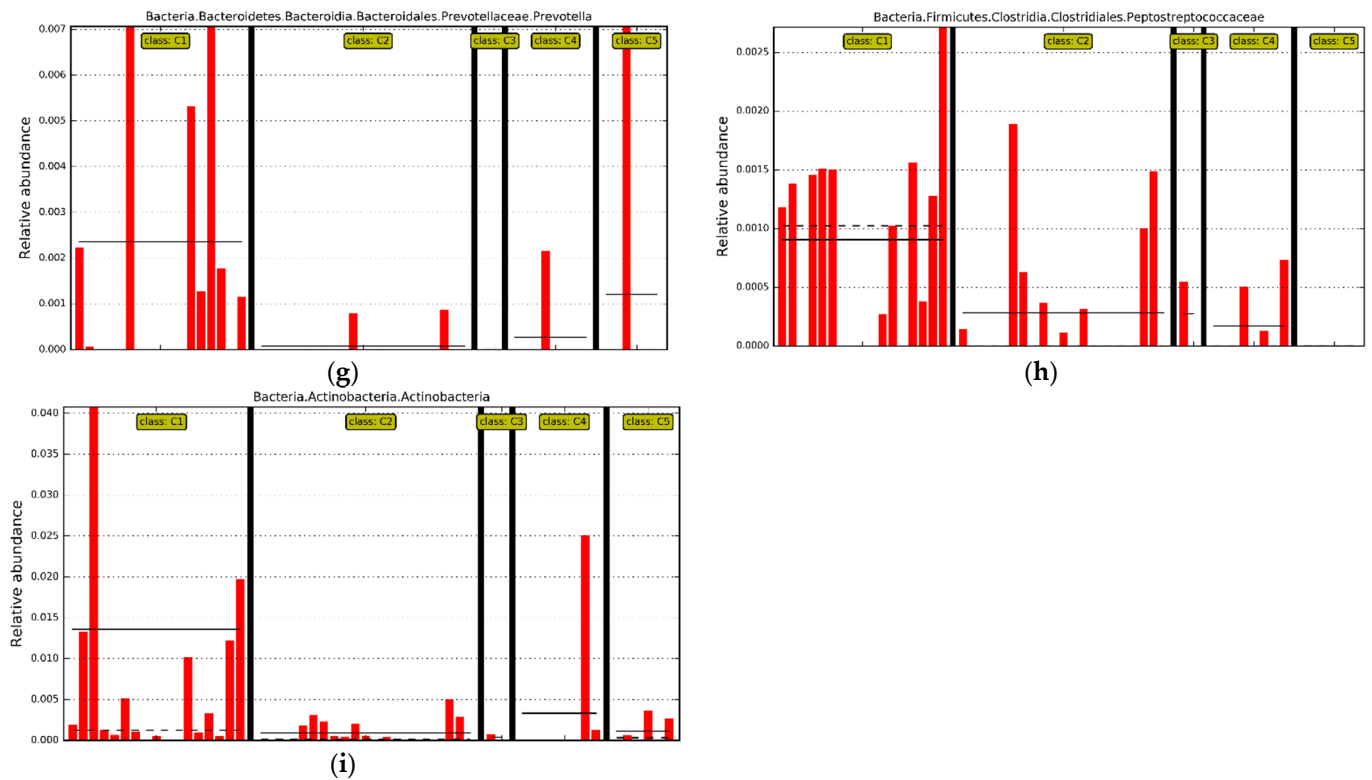

**Figure S1.** Linear discriminant analysis (LDA) combined with effect size measurements (LEfSe) revealed 9 Amplicon Sequence Variants (ASVs) that allow discrimination among the five clusters found (based to content and type of mycotoxins). A  $p$ -value of  $<0.05$  and a score  $\geq 2.0$  were considered significant in Kruskal–Wallis and pairwise Wilcoxon tests, respectively. The horizontal straight line in the panel indicates the cluster means, and the dotted line indicates the cluster medians.
